# Supplementary material
Source: publisher figshare collection journal article supplement (https://frontiersin.figshare.com/ndownloader/files/34498517)
Supplement: Supplementary file [file 34498517]

## Supplementary Material

### Supplementary Figure legends

**SUPPLEMENTARY FIGURE S1** UV-B inhibits cell proliferation in the primary root meristematic zone and does not affect the elongation zone of WT Col-0 seedlings 4 days after the treatment. (A) Root meristematic zone length, (C) cortex cell number and (E) cortex cell length from control or UV-B treated WT Col-0 seedlings 4 days after the treatment. (B) Root elongation zone length, (D) cortex cell number, and (F) cortex cell length from UV-B treated or control WT Col-0 seedlings. Results show the individual values and the average from at least 8 independent biological replicates  $\pm$  S.D from one experiment. Different letters indicate statistically significant differences applying one-way ANOVA (Dunn test,  $P < 0.05$ ). Three independent experiments were performed with similar results. (G) Representative images of primary roots of WT Col-0 seedlings 4 days after a UV-B treatment or kept in the absence of UV-B (control).

**SUPPLEMENTARY FIGURE S2** UV-B similarly inhibits cell proliferation in the primary root meristematic zone of WT Col-0 and *uvr8* seedlings. (A) Root meristematic zone length, (B) cortex cell number and (C) cortex cell length from control or UV-B treated WT Col-0 and *uvr8* seedlings 1 day after the treatment. Different letters indicate statistically significant differences applying two-way ANOVA (Tuckey test,  $P < 0.05$ ). Results show the individual values and the average from at least 8 independent biological replicates  $\pm$  S.D from one experiment. (D) Number of stem cells that are dead 1 day after UV-B exposure in WT Col-0 and *uvr8* primary root meristems. Different letters represent statistically significant differences applying a mixed generalized linear model with a Poisson distribution ( $p > 0.05$ ). Results show the individual values and the average from at least 15 independent biological replicates  $\pm$  S.D from one experiment. Three independent experiments were performed with similar results. (G) Representative images of primary roots of WT Col-0 and *uvr8* seedlings one day after a UV-B treatment or kept in the absence of UV-B (control).

**SUPPLEMENTARY FIGURE S3** UV-B similarly inhibits cell proliferation in the primary root meristematic zone of WT Col-0 and *mpk3* seedlings. (A) Root meristematic zone length, (C) cortex cell number and (E) cortex cell length from control or UV-B treated WT Col-0 and *mpk3* seedlings 1 day after the treatment. Different letters indicate statistically significant differences applying two-way ANOVA (Tuckey test,  $P < 0.05$ ). (B) Ratio between meristematic zone length, (D) cortex cell number, and (F) cortex cell area values measured after UV-B exposure vs those under control conditions in primary roots are shown. Different letters indicate statistically significant differences applying one-way ANOVA (Dunn test,  $P < 0.05$ ). Results show the individual values and the average from at least 8 independent biological replicates  $\pm$  S.D from one experiment. (G) Number of stem cells that are dead 1 day after UV-B exposure in WT Col-0 and *mpk3* primary root meristems. Different letters represent statistically significant differences applying a mixed generalized linear model with a Poisson distribution ( $p > 0.05$ ). Results show the individual values and the average from at least 15 independent biological replicates  $\pm$  S.D from one experiment. Three independent experiments were performed with similar results.

**SUPPLEMENTARY FIGURE S4** UV-B similarly inhibits primary root elongation in WT Col-0 and *msh6* seedlings recovered under white light or under dark conditions. Graphs of average root lengths

of Col-0 and *msh6* seedlings that were grown in the absence of UV-B (control), after UV-B irradiation for 1h at  $9 \mu\text{mol m}^{-2} \text{s}^{-1}$  UV-B and were then kept under normal photoperiod (light) or in the darkness (dark). Results show the individual values and the average from at least 20 biological replicates  $\pm$  S.D from one experiment. Three independent experiments were performed with similar results. Different letters indicate statistically significant differences applying one-way ANOVA (Dunn test,  $P < 0.05$ ).

**SUPPLEMENTARY FIGURE S5** UV-B similarly inhibits cell proliferation but differently affect PCD in the primary root meristematic zone of WT Col-0, Col-4, Ws and Ler seedlings. **(A, D, G)** Root meristematic zone length and **(B, E, H)** cortex cell number from control or UV-B treated WT Col-0, Col-4 **(A, B)**, Ws **(D, E)** and Ler **(G, H)** seedlings 1 day after the treatment. Different letters indicate statistically significant differences applying two-way ANOVA (Tuckey test,  $P < 0.05$ ). Results show the individual values and the average from at least 8 independent biological replicates  $\pm$  S.D from one experiment. **(C, F, I)** Number of stem cells that are dead 1 day after UV-B exposure in WT Col-0, Col-4 **(C)**, Ws **(F)** and Ler **(I)** primary root meristems. Different letters represent statistically significant differences applying a mixed generalized linear model with a Poisson distribution ( $p > 0.05$ ). Results show the individual values and the average from at least 15 independent biological replicates  $\pm$  S.D from one experiment. **(J, K)** Relative CPD levels in the DNA of seedlings under control conditions in the absence of UV-B and immediately after a 1h **(J)** or 4-h **(K)** UV-B treatment. **(J)** Experiments were done using WT Col-0 and Col-3 seedlings. **(K)** Experiments were done using WT Col-0, Col-3, Col-4, Ws and Ler seedlings. Results represent averages  $\pm$  S.D. of six independent biological replicates. Different letters indicate statistically significant differences applying two-way ANOVA (Tuckey test,  $P < 0.05$ ).
